# Supplementary material for: Suspensions of carbon nanofibers in organic medium: rheo-electrical properties
Source: Royal Society of Chemistry journal article supplement (doi:10.1039/c5cp06303e), 2015-01-01
Supplement: c5cp06303e1.pdf [file c5cp06303e1.pdf]

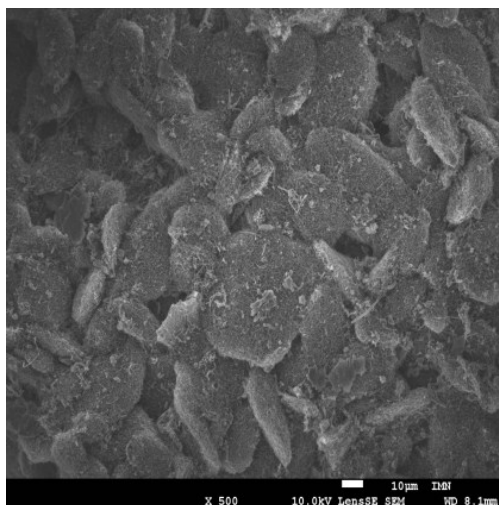

Fig. S-1. SEM micrograph of LiTFSI-free CNFs (the bar corresponds to 10  $\mu\text{m}$ ).

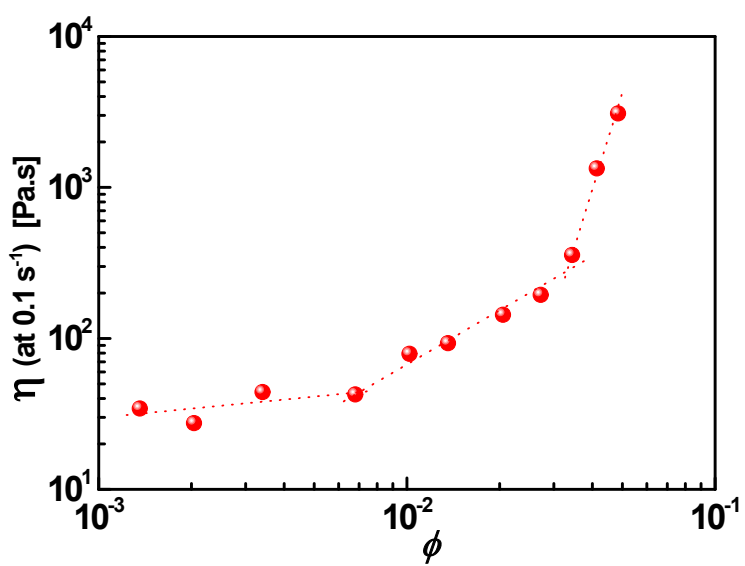

Fig. S-2. Variation of the steady viscosity ( $\eta$ ) at 0.1  $\text{s}^{-1}$  with the volume fraction of the CNFs.

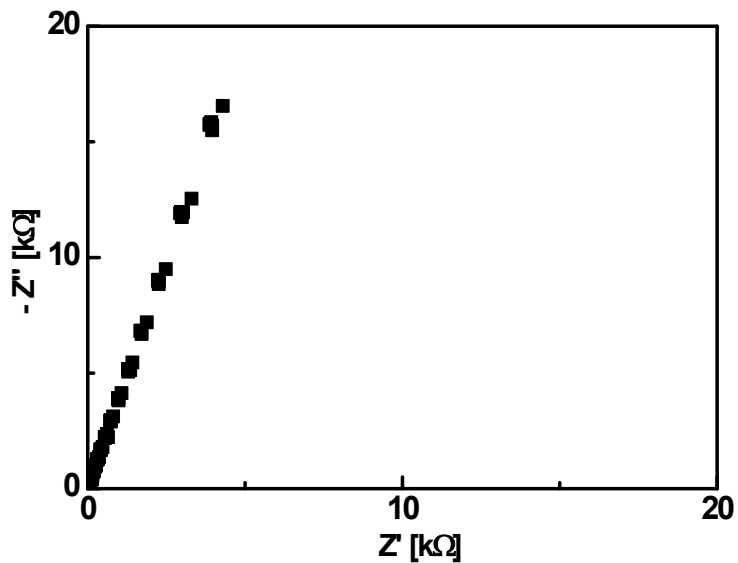

Fig. S-3. The effect of shear rate (from 0 s<sup>-1</sup> to 100 s<sup>-1</sup>) on the electrical properties (represented by Nyquist plots) of CNF suspension at  $\phi=0.00136$ .

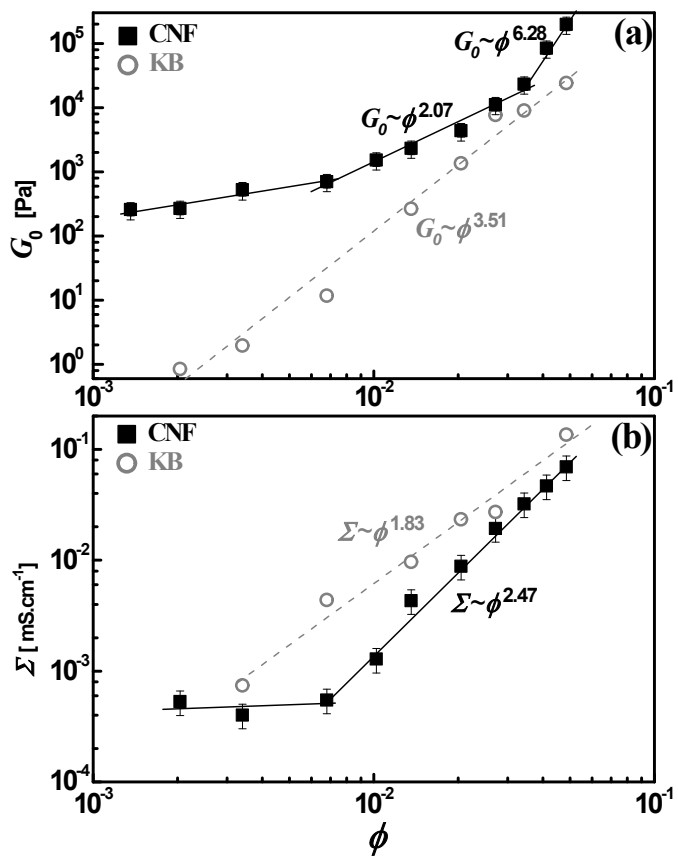

Fig. S-4. Comparison between the variation of (a) plateau modulus ( $G_0$ ) and (b) electrical conductivity ( $\Sigma$ ) of carbon black (Ketjenblack; KB) and carbon nanofiber (CNF) suspensions.

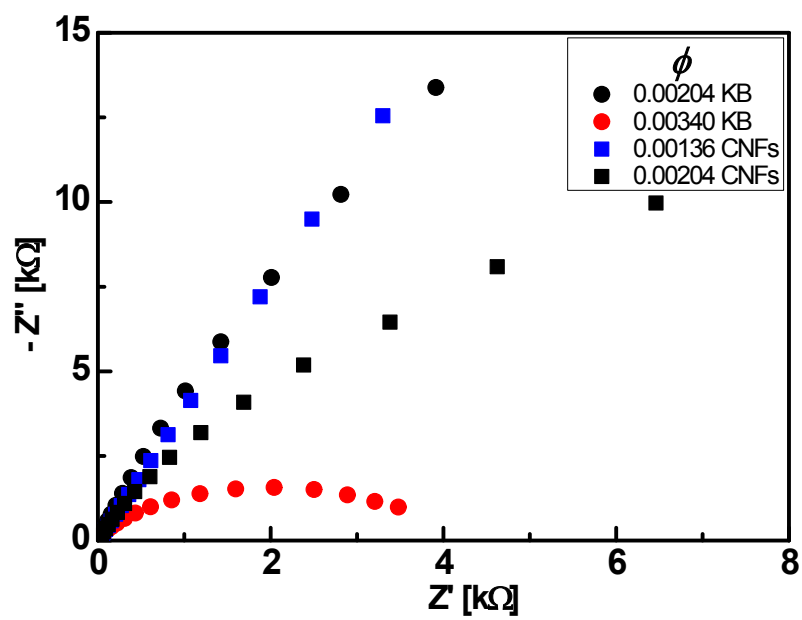

**Fig. S-5.** Comparison between the electrical behavior of CNFs and KB suspensions (represented by Nyquist plots) at low concentrations.
